# Supplementary material for: Extraction and Characterization of Hemicelluloses from a Softwood Acid Sulfite Pulp
Source: MDPI journal article supplement (doi:10.3390/polym13132044), 2021-06-22
Supplement: s1 [file s1]

# Extraction and Characterization of Hemicelluloses from a Softwood Acid Sulfite Pulp

Pauline Vincent <sup>1</sup>, Frédérique Ham-Pichavant <sup>1</sup>, Christelle Michaud <sup>2</sup>, Gérard Mignani <sup>3</sup>, Sergio Mastroianni <sup>3</sup>, Henri Cramail <sup>1,\*</sup> and Stéphane Grelier <sup>1,\*</sup>

<sup>1</sup> CNRS, University Bordeaux, Bordeaux INP, LCPO, UMR 5629, F-33600 Pessac, France; vincent-pauline@live.fr (P.V.); frederique.pichavant@enscbp.fr (F.H.-P.)

<sup>2</sup> Rayonier AM France Innovation, 33174 Gradignan, France; Christelle.Michaud@rayonieram.com

<sup>3</sup> Research and Innovation Center of Lyon, Solvay, 85 Avenue des Frères Perret, 69192 Saint Fons, France; gerard.mignani@solvay.com (G.M.); sergio.mastroianni@solvay.com (S.M.)

\* Correspondence: henri.cramail@enscbp.fr (H.C.); stephane.grelier@enscbp.fr (S.G.)

**Citation:** Vincent, P.; Ham-Pichavant, F.; Michaud, C.; Mignani, G.; Mastroianni, S.; Cramail, H.; Grelier, S. Extraction and Characterization of Hemicelluloses from a Softwood Acid Sulfite Pulp. *Polymers* **2021**, *13*, x. <https://doi.org/10.3390/xxxxx>

Academic Editor: Jean Duhamel

Received: 25 May 2021

Accepted: 17 June 2021

Published: date

**Publisher's Note:** MDPI stays neutral with regard to jurisdictional claims in published maps and institutional affiliations.

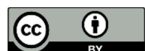

**Copyright:** © 2021 by the authors. Licensee MDPI, Basel, Switzerland. This article is an open access article distributed under the terms and conditions of the Creative Commons Attribution (CC BY) license (<http://creativecommons.org/licenses/by/4.0/>).

Table S1. Results and yields obtained during hemicelluloses extraction procedure.

|         | $m_{\text{initial sulfite pulp}} \text{ (g)}$ | $m_{\text{hemicellulose}} \text{ (g)}$ | Delignification Yields (%) | $m_{\text{initial Hemicellulose loss}} \text{ (g)}$ | $m_{\text{CUnbleached Cellulose}} \text{ (g)}$ | CCE Yields (%) | $m_{\text{hemicelluloses}} \text{ (g)}$ | Hemicelluloses Yields (%) |
|---------|-----------------------------------------------|----------------------------------------|----------------------------|-----------------------------------------------------|------------------------------------------------|----------------|-----------------------------------------|---------------------------|
| HC-A    | 10.00                                         | 9.62                                   | 96.2                       | 9.62                                                | 8.85                                           | 92.0           | 0.64                                    | 6.7                       |
| HC-B    | 10.00                                         | 8.52                                   | 85.2                       | 8.52                                                | 7.33                                           | 86.0           | 0.11                                    | 1.3                       |
| HC-C    | 9.87                                          | 8.69                                   | 88.0                       | 4                                                   | 2.68                                           | 67.0           | 0.38                                    | 9.5                       |
| HC-D    | 19.77                                         | 18.19                                  | 92.0                       | 18.19                                               | 16.37                                          | 90.0           | 0.2                                     | 1.1                       |
| HC-E    | 20.00                                         | 16.02                                  | 80.1                       | 16.02                                               | 12.50                                          | 78.0           | 1.32                                    | 8.2                       |
| HC-F    | 19.99                                         | 18.43                                  | 92.2                       | 15.13                                               | 13.42                                          | 88.7           | 0.48                                    | 3.2                       |
| HC-RYAM | 196.96                                        | 141.81                                 | 72.0                       | 135.74                                              | 102.23                                         | 51.9           | 7.44                                    | 5.5                       |

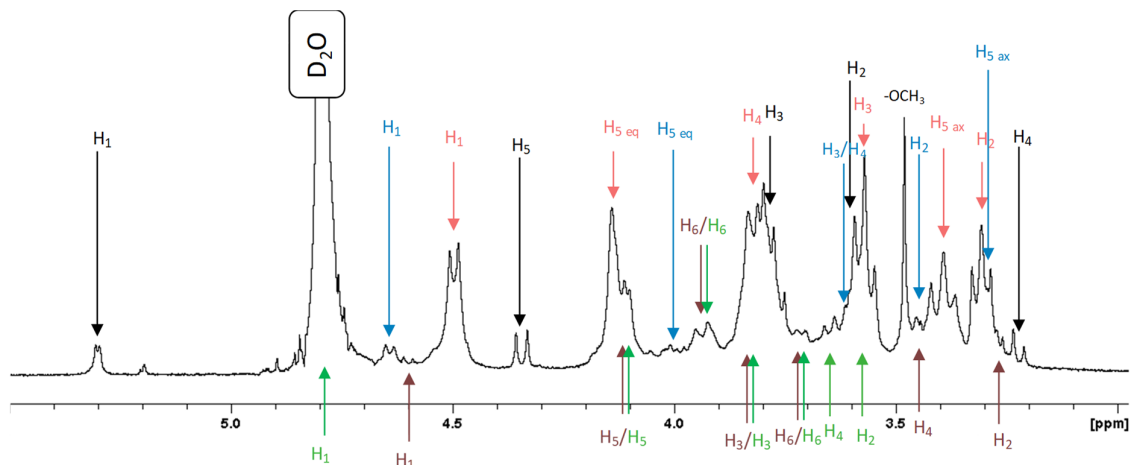

Figure S1.  $^1\text{H}$  NMR spectrum of hemicelluloses extracted from the sulphite pulp in  $\text{D}_2\text{O}$ . (glucose units in brown, mannose units in green, non-substituted xylose units in red, glucuronic acid substituted xylose units in blue, glucuronic acid units in black. The number refers to the H-atom.

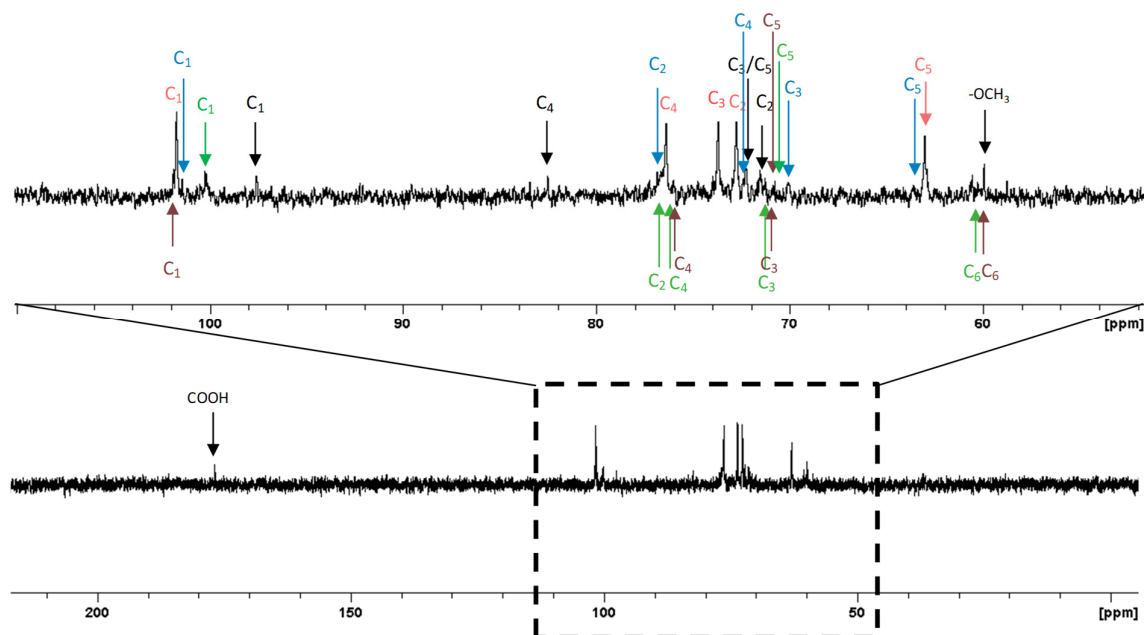

Figure S2.  $^{13}\text{C}$  NMR spectrum of hemicelluloses extracted from the sulphite pulp in  $\text{D}_2\text{O}$ . (glucose units in brown, mannose units in green, non-substituted xylose units in red, glucuronic acid substituted xylose units in blue, glucuronic acid units in black. The number refers to the C-atom.

**Table S2.** Total signals assignation of hemicelluloses extracted from the sulfite pulp in D<sub>2</sub>O.

| Hemicelluloses        | Monosaccharide units                              | Position        | $\delta$ <sup>1</sup> H / <sup>13</sup> C (ppm)              |
|-----------------------|---------------------------------------------------|-----------------|--------------------------------------------------------------|
| Methylglucuronoxylans | $\beta$ -Xylose<br>non substituted                | 1               | 4.50 / 101.74<br>( <sup>3</sup> J <sub>H1-H2</sub> = 7.88Hz) |
|                       |                                                   | 2               | 3.30 / 72.77                                                 |
|                       |                                                   | 3               | 3.57 / 73.74                                                 |
|                       |                                                   | 4               | 3.81 / 76.42                                                 |
|                       |                                                   | 5 <sub>ax</sub> | 3.39 / 63.03                                                 |
|                       |                                                   | 5 <sub>eq</sub> | 4.14 / 63.03                                                 |
|                       | $\beta$ -Xylose<br>substitued                     | 1               | 4.64 / 101.45<br>( <sup>3</sup> J <sub>H1-H2</sub> = 7.64Hz) |
|                       |                                                   | 2               | 3.43 / 76.46                                                 |
|                       |                                                   | 3               | 3.62 / 69.28                                                 |
|                       |                                                   | 4               | 3.62 / 72.42                                                 |
|                       |                                                   | 5 <sub>ax</sub> | 3.30 / 65.12                                                 |
|                       |                                                   | 5 <sub>eq</sub> | 3.98 / 65.12                                                 |
|                       | 4- <i>O</i> -Methyl-<br>$\alpha$ -Glucuronic acid | 1               | 5.3 / 97.59<br>( <sup>3</sup> J <sub>H1-H2</sub> = 3.6 Hz)   |
|                       |                                                   | 2               | 3.58 / 71.30                                                 |
|                       |                                                   | 3               | 3.76 / 72.30                                                 |
|                       |                                                   | 4               | 3.23 / 82.55                                                 |
|                       |                                                   | 5               | 4.34 / 72.26                                                 |
|                       |                                                   | -COOH           | - / 176.80                                                   |
|                       |                                                   | -OCH3           | 3.48 / 59.98                                                 |
| Glucomannans          | $\beta$ -Mannose                                  | 1               | 4.76 / 100.20<br>( <sup>3</sup> J <sub>H1-H2</sub> = - Hz)   |
|                       |                                                   | 2               | 3.56 / 76.36                                                 |
|                       |                                                   | 3               | 3.78 / 71.57                                                 |
|                       |                                                   | 4               | 3.57 / 74.95                                                 |
|                       |                                                   | 5               | 4.12 / 70.07                                                 |
|                       |                                                   | 6               | 3.72 et 3.94 / 60.58                                         |
|                       | $\beta$ -Glucose                                  | 1               | 4.60 / 101.90<br>( <sup>3</sup> J <sub>H1-H2</sub> = 8 Hz)   |
|                       |                                                   | 2               | 3.26 / 73.54                                                 |
|                       |                                                   | 3               | 3.78 / 71.57                                                 |
|                       |                                                   | 4               | 3.43 / 75.28                                                 |
|                       |                                                   | 5               | 4.12 / 70.07                                                 |
|                       |                                                   | 6               | 3.72 et 3.94 / 60.58                                         |

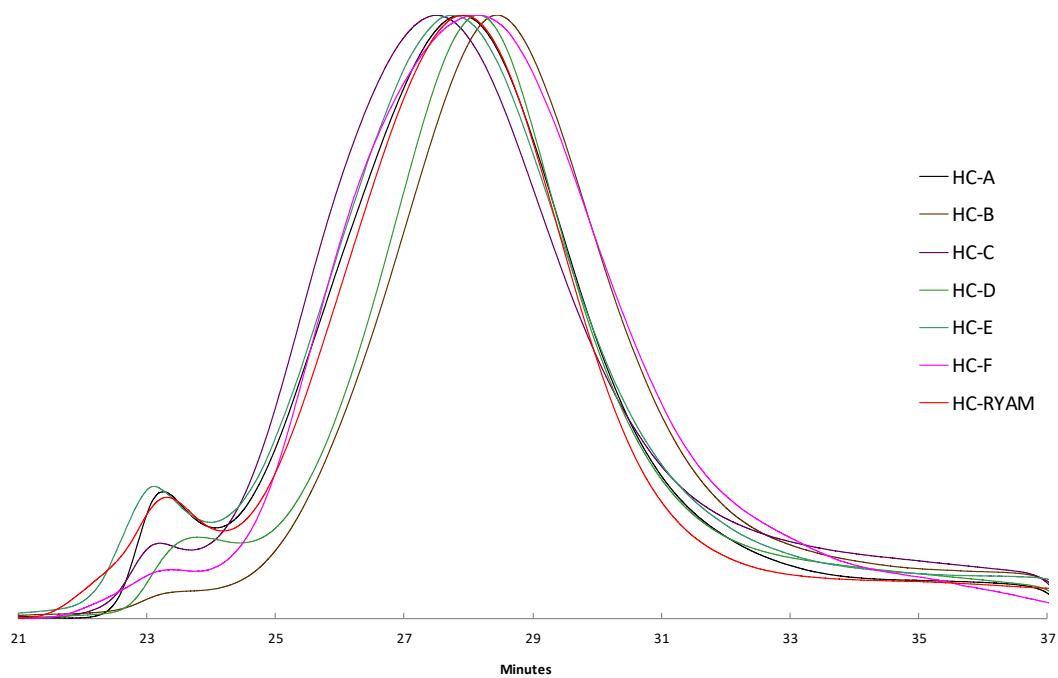

**Figure S3.** SEC-RI chromatograms of hemicelluloses extracted from the sulfite pulp.
